# Supplementary material
Source: PubMed Central journal article supplement (PMC3563259)
Supplement: NIHMS406885-supplement-Supp_Table_1.pdf [file NIHMS406885-supplement-Supp_Table_1.pdf]

**Supplemental Table 1:** Baseline characteristics of elderly subjects according to availability of follow-up ankle brachial index (ABI)<sup>a</sup>

|                                               | Follow-up ABI<br>Not Available<br>(N=1320) | Follow-up ABI<br>Available<br>(N=2108) | p-value |
|-----------------------------------------------|--------------------------------------------|----------------------------------------|---------|
| Age (years)                                   | 76.2 ± 5.6                                 | 73.4 ± 4.2                             | <0.0001 |
| Body mass index (kg/m <sup>2</sup> )          | 26.5 ± 4.9                                 | 26.8 ± 4.4                             | 0.1     |
| Female gender (%)                             | 59.6                                       | 61.3                                   | 0.3     |
| White race (%)                                | 84.1                                       | 84.7                                   | 0.6     |
| Current Smokers (%)                           | 10.1                                       | 12.0                                   | 0.01    |
| Moderate or high intensity exercise (%)       | 50.6                                       | 41.8                                   | <0.0001 |
| Current alcohol use (%)                       | 50.7                                       | 44.8                                   | 0.0007  |
| Diabetes (%)                                  | 7.6                                        | 5.7                                    | 0.1     |
| Hypertension (%)                              | 42.3                                       | 35.5                                   | <0.0001 |
| Known coronary heart disease <sup>b</sup> (%) | 22.2                                       | 14.9                                   | <0.0001 |

|                                                     |              |              |         |
|-----------------------------------------------------|--------------|--------------|---------|
| Known cerebrovascular disease <sup>c</sup> (%)      | 3.5          | 8.0          | <0.0001 |
| Baseline insulin (pmol/L)                           | 83.3 ± 101.4 | 80.56 ± 55.6 | 0.3     |
| (μIU/ml)                                            | 12.0 ± 14.6  | 11.6 ± 8.0   |         |
| Baseline blood glucose (mmol/L)                     | 5.68 ± 1.17  | 5.63 ± 1.21  | 0.3     |
| (mg/dl)                                             | 102.3 ± 21.0 | 101.5 ± 21.8 |         |
| Low density lipoprotein cholesterol (mmol/L)        | 3.25 ± 0.88  | 3.32 ± 0.82  | 0.02    |
| (mg/dl)                                             | 125.6 ± 33.9 | 128.3 ± 31.7 |         |
| High density lipoprotein cholesterol (mmol/L)       | 1.42 ± 0.39  | 1.41 ± 0.37  | 0.2     |
| (mg/dl)                                             | 54.9 ± 15.0  | 54.3 ± 14.3  |         |
| Estimated GFR cystatin (ml/min/1.73m <sup>2</sup> ) | 70.0 ± 18.6  | 75.3 ± 16.4  | <0.0001 |
| C-reactive protein (nmol/L)                         | 49.52 ± 85.7 | 44.8 ± 85.7  | 0.08    |
| (mg/L)                                              | 5.2 ± 9.0    | 4.7 ± 9.0    |         |
| Cystatin C (nmol/L)                                 | 89.9 ± 75.2  | 76.0 ± 15.0  | <0.0001 |
| (mg/L)                                              | 1.2 ± 3      | 1.1 ± 2      |         |

<sup>a</sup>Continuous variables are presented as means ± standard deviations

<sup>b</sup>Known coronary heart disease includes prior myocardial infarction, coronary artery bypass grafting, percutaneous coronary intervention, or angina.

<sup>c</sup>Known cerebrovascular disease includes prior cerebrovascular accident or transient ischemic attack
